# Supplementary material for: Strategies for the Management of Spike Protein-Related Pathology
Source: MDPI journal article supplement (doi:10.3390/microorganisms11051308), 2023-05-17
Supplement: s1 [file s1]

Supplementary Table S1: Overview of Clinical Trials for long COVID-19 and COVID-19 vaccine injury.

| Intervention class | Intervention                            | Clinical trials                                                                                                                                                                  |
|--------------------|-----------------------------------------|----------------------------------------------------------------------------------------------------------------------------------------------------------------------------------|
| Lifestyle          | Exercise                                | NCT05566483<br>NCT05543408<br>NCT05530317<br>NCT05453175<br>NCT05360563<br>NCT05204511<br>NCT05094622<br>NCT04950725<br>NCT04900961<br>NCT04898205                               |
|                    | Mindfulness                             | NCT05566379<br>NCT05419219<br>NCT05268523<br>NCT05139979<br>NCT05107440<br>NCT04854772<br>NCT05119608<br>NCT05566379                                                             |
|                    | Wearable                                | NCT05507190<br>NCT05228665<br>NCT05019963                                                                                                                                        |
|                    | Coaching                                | NCT05453201<br>NCT05422924<br>NCT05389592<br>NCT05338749<br>NCT05254301<br>NCT05167266<br>NCT04961333                                                                            |
|                    | Physio/Rehab                            | NCT05453188<br>NCT05398692<br>NCT05373043<br>NCT05244044<br>NCT05238415<br>NCT05196529<br>NCT05040893<br>NCT05003271<br>NCT04996212<br>NCT04841759<br>NCT04649918<br>NCT05566483 |
|                    | Transcranial direct current stimulation | NCT05389592<br>NCT05359770<br>NCT05289115<br>NCT05252481<br>NCT05126511<br>NCT05092516<br>NCT04890483                                                                            |

|                                                                                  |                              |                                             |
|----------------------------------------------------------------------------------|------------------------------|---------------------------------------------|
|                                                                                  | Acupuncture                  | NCT05212688                                 |
|                                                                                  | Vagus nerve stimulation      | NCT05205577                                 |
|                                                                                  | Electrical stimulation       | NCT05200858<br>NCT05190718                  |
|                                                                                  | Homeopathy                   | NCT05104749                                 |
|                                                                                  | Osteopathy                   | NCT05012826<br>NCT04928456*<br>NCT05069636* |
|                                                                                  | Singing                      | NCT04810065                                 |
| Probiotics                                                                       | Faecal Microbiota Transplant | NCT05556733                                 |
|                                                                                  | Probiotic supplement         | NCT05080244<br>NCT05195151*                 |
| Plasmapheresis                                                                   | Plasma transfer              | NCT05543590<br>NCT05445674                  |
| Anti-inflammatory<br>/antioxidant<br>/mitochondrial<br>/metabolism<br>modulators | Echinochrome A               | NCT05531019                                 |
|                                                                                  | Ibudilast                    | NCT05513560                                 |
|                                                                                  | Mitoquinone                  | NCT05373043                                 |
|                                                                                  | Prospekta                    | NCT05074888                                 |
|                                                                                  | Coenzyme Q10                 | NCT04960215                                 |
|                                                                                  | RSLV-132                     | NCT04944121                                 |
|                                                                                  | Niagen                       | NCT04809974                                 |
|                                                                                  | NAD+                         | NCT04604704                                 |
|                                                                                  | metformin                    | NCT03996538*                                |
|                                                                                  | Ketogenic diet               | NCT05163743*                                |
| Blood Thinners                                                                   | Pentoxifylline               | NCT05513560                                 |
|                                                                                  | Atorvastatin (statin)        | NCT04904536                                 |
|                                                                                  | Plant stanol esters          | NCT04844346                                 |

|                            |                                                               |                                           |
|----------------------------|---------------------------------------------------------------|-------------------------------------------|
| Immunomodulators           | Temelimab                                                     | NCT05497089                               |
|                            | human<br>immunoglobulin                                       | NCT05220280                               |
|                            | MABPACs                                                       | NCT05013723                               |
|                            | Sirolimus<br>(rapamycin)                                      | NCT04948203                               |
|                            | Ampion                                                        | NCT04880161                               |
|                            | Montelukast                                                   | NCT04695704                               |
|                            | Leronlimab                                                    | NCT04678830                               |
|                            | Zilucoplan                                                    | NCT04382755                               |
|                            | ergoferon                                                     | NCT05069649                               |
|                            | mycophenolate<br>mofetil/mycophenolic<br>acid or azathioprine | NCT05060991*                              |
|                            | Rituximab                                                     | NCT04877496*                              |
|                            | LYT-100<br>(Deupirfenidone)                                   | NCT04652518                               |
| Heart medication           | Ivabradine                                                    | NCT05481177                               |
|                            | Metoprolol Succinate                                          | NCT05096884                               |
| Fibromyalgia<br>medication | TNX-102 SL                                                    | NCT05472090                               |
| Hemp/CBD                   | Xltranplus, Xltran                                            | NCT05467904                               |
|                            | CBD                                                           | NCT04997395<br>NCT04828668<br>NCT04777981 |
| Oxygen therapies           | portable oxygen<br>concentrator                               | NCT05212831                               |
|                            | Hyperbaric oxygen                                             | NCT04905888<br>NCT04842448                |
| Stem cells                 | bone marrow-derived<br>mesenchymal stem<br>cells              | NCT05116761                               |
|                            | Allogeneic Adipose-<br>Derived<br>Mesenchymal Stem<br>Cells   | NCT04992247                               |
| Antidepressant             | Vortioxetine                                                  | NCT05047952                               |

|                 |                                                                   |              |
|-----------------|-------------------------------------------------------------------|--------------|
|                 | Pimozide (For tinnitus specifically)                              | NCT05507372  |
| Nasal spray     | S-1226                                                            | NCT04949386  |
|                 | Sodium pyruvate                                                   | NCT04871815  |
| Adaptogens      | ADAPT-232                                                         | NCT04795557  |
| Flavonoids      | Geneisten (BIO 300)                                               | NCT04482595  |
|                 | Mushroom mixture (Fomitopsis officinalis and Trametes versicolor) | NCT04951336* |
| Biologics       | Zofin (derived from amniotic fluid)                               | NCT05228899  |
| Dietary support | Iron                                                              | NCT04915820* |
| Antibiotics     | Azithromycin                                                      | NCT04699097  |

Clinical trials are conducted for a long period unless otherwise stated. Clinical trials are for long Covid unless otherwise stated. \*Vaccine immune response.
